# Supplementary material for: Assessment of liquid biofuel potential from energy crops within the sustainable water–land–energy–carbon nexus
Source: Royal Society of Chemistry journal article supplement (doi:10.1039/d0se00814a), 2020-12-21
Supplement: d0se00814a1.pdf [file d0se00814a1.pdf]

### 1. Some tables of sweet sorghum-based fuel ethanol:

Energy consumption:

Table 5-1 Energy consumption during Sweet sorghum cultivation stage

| Input materials            | Nitrogen fertilizer | Phosphate fertilizer | Potash | herbicide | Insecticide | Diesel  | lime   | total    |
|----------------------------|---------------------|----------------------|--------|-----------|-------------|---------|--------|----------|
| Unit                       | kg                  | kg                   | kg     | kg        | kg          | L       | kg     |          |
| Input amount (unit/ ha)    | 211.40              | 63.20                | 54.00  | 5.04      | 0.75        | 67.00   | 28.00  |          |
| Energy intensity (MJ/unit) | 46.50               | 7.03                 | 6.85   | 266.56    | 284.82      | 44.13   | 7.30   |          |
| Energy input (MJ/ ha)      | 9830.10             | 444.30               | 369.90 | 1343.46   | 213.62      | 2956.71 | 204.40 | 15362.48 |
| Percent%                   | 63.99%              | 2.89%                | 2.41%  | 8.75%     | 1.39%       | 19.25%  | 1.33%  | 100.00%  |

Table 5-2 Energy consumption for transportation of Sweet sorghum fuel ethanol

| Sweet sorghum fuel ethanol                            | Items                                    | Transport | Units                          | Input   |
|-------------------------------------------------------|------------------------------------------|-----------|--------------------------------|---------|
|                                                       | Transport distance                       | highway   | km                             | 88.00   |
|                                                       | Energy intensity                         | highway   | MJ/L                           | 44.13   |
|                                                       | Fuel consumption intensity               | highway   | L/t.km                         | 0.05    |
| Transport raw materials to ethanol production factory | Fuel energy consumption intensity        | highway   | MJ/t.km                        | 2.21    |
|                                                       |                                          | railway   |                                | 0.077   |
|                                                       | Raw material transportation energy input |           | MJ/t raw material              | 194.17  |
|                                                       | Conversion rates                         |           | t raw material /t fuel ethanol | 1:16    |
|                                                       | Converted to ethanol                     |           | MJ/t fuel ethanol              | 3106.75 |
| Factory to distribution site                          | Transport distance                       | highway   | km                             | 100.00  |
|                                                       |                                          | railway   |                                | 500.00  |
|                                                       | Energy input                             |           | MJ/t fuel ethanol              | 259.15  |
| Total                                                 |                                          |           | MJ/t fuel ethanol              | 3365.90 |

Table 5-3 Energy consumption for fuel ethanol production

| Stage                             | Energy Consumption |             |             |             | By-product energy supply |
|-----------------------------------|--------------------|-------------|-------------|-------------|--------------------------|
|                                   | Electricity        | Steam       | Coal        | Heat air    | Solid particulate fuel   |
|                                   | kwh/t ethanol      | t/t ethanol | t/t ethanol | t/t ethanol | t/t ethanol              |
| Pretreatment                      | 95.00              |             |             |             |                          |
| Solid fermentation                | 50.00              | 0.20        |             |             |                          |
| Continuous steaming-rectification | 25.00              | 2.40        |             |             |                          |

|                                       |         |          |          |          |          |
|---------------------------------------|---------|----------|----------|----------|----------|
| Molecular sieve dehydration           | 40.00   | 1.90     |          |          |          |
| Slag deep processing                  | 143.00  |          |          | 49.88    |          |
| Auxiliary equipment                   | 20.00   |          | 0.61     |          |          |
| By-product production                 | 106.00  |          |          |          | 1.18     |
| transsexual                           | 7.42    |          |          |          |          |
| Total                                 | 486.42  | 4.50     | 0.61     | 49.88    | 1.18     |
| Energy intensit (MJ/t)                | 3.60    | 2637.61  | 29270.00 | 98.70    | 14670.00 |
| Total energy (MJ/t ethanol)           | 1751.10 | 11869.25 | 17889.82 | 4923.58  | 17310.60 |
| Net energy consumption (MJ/t ethanol) |         |          |          | 19123.15 |          |

#### Emissions:

Environmental emissions during the planting stage of sweet sorghum are mainly caused by pesticides, fertilizers and power energy. According to the quantity of each substance input in the planting stage of sweet sorghum (Table 5-1) and the corresponding emission parameters of each substance (Table 5-4), the emission of various substances produced per unit area in the planting stage of sweet sorghum (Table 5 -5) can be obtained. It can be seen from the table that N fertilizer emissions are the largest contributor to the sweet sorghum planting stage, followed by herbicides and diesel.

NOTE: VOC (Volatile Organic Compounds) 、 CO (Carbon monoxide) 、 CO<sub>2</sub> (carbon dioxide) 、 CH<sub>4</sub>、 NO<sub>x</sub>、 N<sub>2</sub>O、 SO<sub>x</sub> and PM<sub>10</sub>.

Table 5-4 Emissions during the Sweet sorghum cultivation stage (g/ha)

| Input            | Nitrogen fertilizer | Phosphate fertilizer | Potash   | herbicide | Insecticide | Diesel    | lime   | total     |
|------------------|---------------------|----------------------|----------|-----------|-------------|-----------|--------|-----------|
| VOC              | 1386.27             | 6.30                 | 31.48    | 69.86     | 12.86       | 72.87     | 0.11   | 1579.76   |
| CO               | 299.26              | 39.18                | 17.06    | 64.88     | 14.69       | 118.68    | 0.67   | 554.42    |
| NO <sub>x</sub>  | 1038.46             | 164.32               | 41.96    | 486.38    | 84.77       | 184.05    | 1.86   | 2001.79   |
| PM <sub>10</sub> | 370.17              | 13.08                | 8.83     | 166.78    | 26.71       | 16.36     | 0.16   | 602.09    |
| SO <sub>x</sub>  | 1847.51             | 40.75                | 200.29   | 504.02    | 79.27       | 1.47      | 0.23   | 2673.53   |
| CH <sub>4</sub>  | 345.51              | 74.48                | 36.07    | 161.05    | 26.55       | 1.34      | 0.88   | 645.87    |
| N <sub>2</sub> O | 14.61               | 0.92                 | 0.43     | 1.18      | 0.21        | 5.03      | 0.01   | 22.39     |
| CO <sub>2</sub>  | 458771.82           | 27309.52             | 24283.80 | 118421.70 | 18987.42    | 214363.82 | 542.44 | 862680.53 |

Table 5-5 Emissions for the transportation of Sweet sorghum (g/t ethanol)

| Diesel    | VOC  | CO   | NO <sub>x</sub> | PM <sub>10</sub> | SO <sub>x</sub> | CH <sub>4</sub> | N <sub>2</sub> O | CO <sub>2</sub> |
|-----------|------|------|-----------------|------------------|-----------------|-----------------|------------------|-----------------|
| Emissions | 4.79 | 7.79 | 12.09           | 1.07             | 0.10            | 0.09            | 0.33             | 14077.62        |

Table 5-6 Emissions for the transportation of Sweet sorghum for 1 ton fuel ethanol production(g/t ethanol)

| Diesel    | VOC   | CO     | NO <sub>x</sub> | PM <sub>10</sub> | SO <sub>x</sub> | CH <sub>4</sub> | N <sub>2</sub> O | CO <sub>2</sub> |
|-----------|-------|--------|-----------------|------------------|-----------------|-----------------|------------------|-----------------|
| Emissions | 76.57 | 124.70 | 193.39          | 17.19            | 1.55            | 1.41            | 5.28             | 225241.98       |

Table 5-7 Emissions for the transportation of ethanol by truck(g/t ethanol)

| Diesel    | VOC  | CO   | NO <sub>x</sub> | PM <sub>10</sub> | SO <sub>x</sub> | CH <sub>4</sub> | N <sub>2</sub> O | CO <sub>2</sub> |
|-----------|------|------|-----------------|------------------|-----------------|-----------------|------------------|-----------------|
| Emissions | 5.44 | 8.86 | 13.74           | 1.22             | 0.11            | 0.10            | 0.38             | 15997.30        |

Table 5-8 Emissions for the transportation of fuel ethanol by diesel locomotive (g/t ethanol)

| Diesel    | VOC  | CO   | NO <sub>x</sub> | PM <sub>10</sub> | SO <sub>x</sub> | CH <sub>4</sub> | N <sub>2</sub> O | CO <sub>2</sub> |
|-----------|------|------|-----------------|------------------|-----------------|-----------------|------------------|-----------------|
| Emissions | 1.00 | 1.63 | 2.53            | 0.22             | 0.02            | 0.02            | 0.07             | 2941.90         |

Table 5-9 Emissions for the transportation of fuel ethanol electric locomotive(g/t ethanol)

| Electricity | VOC  | CO   | NO <sub>x</sub> | PM <sub>10</sub> | SO <sub>x</sub> | CH <sub>4</sub> | N <sub>2</sub> O | CO <sub>2</sub> |
|-------------|------|------|-----------------|------------------|-----------------|-----------------|------------------|-----------------|
| Emissions   | 0.01 | 0.09 | 1.15            | 0.11             | 2.75            | 0.01            | 0.01             | 896.03          |

Table 5-10 Emissions for the Fuel ethanol production(g/t ethanol)

| Input | VOC   | CO      | NO <sub>x</sub> | PM <sub>10</sub> | SO <sub>x</sub> | CH <sub>4</sub> | N <sub>2</sub> O | CO <sub>2</sub> |
|-------|-------|---------|-----------------|------------------|-----------------|-----------------|------------------|-----------------|
| Coal  | 16.30 | 1631.50 | 3588.97         | 214.93           | 10190.19        | 19.01           | 12.90            | 1647631.10      |
| Steam | 6.46  | 188.84  | 768.65          | 13.58            | 4355.20         | 933.51          | 2.59             | 565695.00       |

Table 5-11 Emissions for the distribution of fuel ethanol(g/t ethanol)

| Electricity | VOC  | CO   | NO <sub>x</sub> | PM <sub>10</sub> | SO <sub>x</sub> | CH <sub>4</sub> | N <sub>2</sub> O | CO <sub>2</sub> |
|-------------|------|------|-----------------|------------------|-----------------|-----------------|------------------|-----------------|
| Emissions   | 0.00 | 0.04 | 0.47            | 0.05             | 1.12            | 0.00            | 0.00             | 366.73          |

Table 5-12 Cost analysis of the stage of growth and transport of Sweet Sorghum

| Stage    | Substage | Cost items | Price (yuan/ha) |
|----------|----------|------------|-----------------|
| Planting | farming  | Land rent  | 3468.00         |
|          |          | seed       | 867.00          |
|          |          | Mulch      | 564.13          |

|                |                            |          |
|----------------|----------------------------|----------|
|                | Fertilize                  | 1535.17  |
|                | Agricultural machinery     | 1376.80  |
|                | irrigation                 | 716.72   |
|                | Wages                      | 2427.60  |
|                | other                      | 43.93    |
|                | acquisition                | 0.00     |
|                | Harvesting costs           | 693.60   |
|                | Bundle material fee        | 346.80   |
| Transportation | Fuel consumption and labor | 742.15   |
| 合计             |                            | 12781.89 |

Table 5-13 Cost analysis of the production and distribution of fuel ethanol

| Stage                        | Items                   | subitems          | Price (yuan/t) |
|------------------------------|-------------------------|-------------------|----------------|
| Fuel ethanol production cost |                         |                   |                |
|                              | stalk raw material cost |                   | 3418.00        |
|                              | Accessories cost        | Glucoamylase etc. | 208.08         |
|                              | Water cost              |                   | 152.59         |
|                              | Electricity cost        |                   | 282.06         |
|                              | Steam cost              |                   | 156.75         |
|                              | Labor cost              |                   | 242.76         |
|                              | Depreciation            |                   | 369.92         |
|                              | By-product offset costs | Pellet fuel       | 1005.72        |
| Fuel ethanol distribution    | Distribution cost       |                   | 12.00          |
| Unit cost of ethanol         |                         |                   | 3836.28        |

The value of the production and investment ratio of the fuel ethanol produced by sweet sorghum refers to the ratio of the sales value of fuel ethanol per unit mass to the cost input of each stage of the production unit of the quality ethanol of fuel sorghum fuel. The sales price of fuel ethanol is uniformly 5,000 yuan / t. The value input of the whole life cycle of sweet sorghum fuel ethanol production is 3838.28 yuan / t. Therefore, the value of the production-investment ratio of sweet sorghum fuel ethanol is 1.30.

## 2. Some tables of cassava-based fuel ethanol:

Table 5-14 Energy consumption during cassava cultivation stage

| Input                   | Nitrogen fertilizer | Phosphate fertilizer | Potash | herbicide | Insecticide | Diesel | lime | total |
|-------------------------|---------------------|----------------------|--------|-----------|-------------|--------|------|-------|
| Unit                    | kg                  | kg                   | kg     | kg        | kg          | L      | Kwh  |       |
| Input amount (unit/ ha) | 100                 | 100                  | 200    | 0.6       | 1.2         | 44     | 90   |       |

|                               |        |       |        |         |         |         |       |         |
|-------------------------------|--------|-------|--------|---------|---------|---------|-------|---------|
| Energy intensity<br>(MJ/unit) | 46.5   | 7.03  | 6.85   | 266.56  | 284.82  | 44.13   | 3.6   |         |
| Energy input<br>(MJ/ ha)      | 4650   | 703   | 1370   | 159.936 | 341.784 | 1941.72 | 324   | 9490.44 |
| Percent%                      | 49.00% | 7.41% | 14.44% | 1.69%   | 3.60%   | 20.46%  | 3.41% | 100.00% |

Table 5-15 Energy consumption for transportation of cassava fuel ethanol

| Cassava fuel ethanol                                  | Items                                    | Transport | Units                          | Input  |
|-------------------------------------------------------|------------------------------------------|-----------|--------------------------------|--------|
| Transport raw materials to ethanol production factory | Transport distance                       | 公路        | km                             | 100.00 |
|                                                       | Energy intensity                         |           | MJ/L                           | 44.13  |
|                                                       | Fuel consumption intensity               |           | L/t.km                         | 0.05   |
|                                                       | Fuel energy consumption intensity        |           | MJ/t-km                        | 2.21   |
|                                                       | Raw material transportation energy input |           | MJ/t raw material              | 220.65 |
|                                                       | Conversion rates                         |           | t raw material /t fuel ethanol | 2.90   |
|                                                       | Converted to ethanol                     |           | MJ/t fuel ethanol              | 639.89 |
| Factory to distribution site                          | Transport distance                       | highway   | km                             | 100.00 |
|                                                       |                                          | railway   | km                             | 500.00 |
|                                                       | Energy input                             | highway   | MJ/t-km                        | 2.21   |
|                                                       | Energy input                             | railway   | MJ/t-km                        | 0.08   |
|                                                       | Energy input                             |           | MJ/t fuel ethanol              | 259.15 |
| Total                                                 |                                          |           | MJ/t fuel ethanol              | 899.04 |

Table 5-16 Energy consumption for fuel ethanol production

| Stage                                       | Energy Consumption           |                      |                     |
|---------------------------------------------|------------------------------|----------------------|---------------------|
|                                             | Electricity<br>kwh/t ethanol | Steam<br>t/t ethanol | Coal<br>t/t ethanol |
| Crush and mix                               | 30.29                        |                      |                     |
| Liquefaction and saccharification           | 12.98                        | 0.72                 |                     |
| Fermentation                                | 41.97                        |                      |                     |
| Distillation                                | 24.28                        | 2.31                 |                     |
| Post-processing                             | 70.58                        | 0.79                 |                     |
| Auxiliary equipment                         | 19.83                        | 0.07                 | 0.54                |
| transsexual                                 | 7.42                         |                      |                     |
| Total                                       | 207.35                       | 3.89                 | 0.54                |
| By-product supply FE <sub>5</sub>           | 205.06                       | 3.89                 |                     |
| Net consumption                             | 2.29                         |                      | 0.54                |
| Energy intensity                            | 3.6 MJ/kWh                   | 2637.61 MJ/t         | 29270 MJ/t          |
| Net energy consumption (MJ/t ethanol)       | 8.23                         |                      | 15893               |
| Total net energy consumption (MJ/t ethanol) |                              | 15901.23             |                     |

Input N fertilizer P fertilizer K fertilizer Herbicide Diesel Electricity Pesticide Total

Table 5-17 Emissions during the cassava cultivation stage

| Input            | N fertilizer | P fertilizer | K fertilizer | Herbicide | Diesel    | Electricity | Pesticide | Total     |
|------------------|--------------|--------------|--------------|-----------|-----------|-------------|-----------|-----------|
| VOC              | 655.76       | 9.97         | 116.60       | 8.32      | 47.85     | 0.45        | 20.58     | 859.53    |
| CO               | 141.56       | 62.00        | 63.20        | 7.72      | 77.94     | 3.69        | 23.50     | 379.61    |
| NO <sub>x</sub>  | 491.23       | 260.00       | 155.40       | 57.90     | 120.87    | 47.88       | 135.63    | 1268.91   |
| PM <sub>10</sub> | 175.10       | 20.70        | 32.71        | 19.85     | 10.74     | 4.77        | 42.74     | 306.62    |
| SO <sub>x</sub>  | 873.94       | 64.47        | 741.80       | 60.00     | 0.97      | 114.12      | 126.84    | 1982.14   |
| CH <sub>4</sub>  | 163.44       | 117.85       | 133.58       | 19.17     | 0.88      | 0.36        | 42.47     | 477.75    |
| N <sub>2</sub> O | 6.91         | 1.46         | 1.59         | 0.14      | 3.30      | 0.45        | 0.34      | 14.19     |
| CO <sub>2</sub>  | 217016.00    | 43211.27     | 89940.00     | 14097.82  | 140776.24 | 37210.68    | 30379.87  | 572631.89 |

Table 5-18 Emissions for the transportation of cassava

| Diesel    | VOC  | CO   | NO <sub>x</sub> | PM <sub>10</sub> | SO <sub>x</sub> | CH <sub>4</sub> | N <sub>2</sub> O | CO <sub>2</sub> |
|-----------|------|------|-----------------|------------------|-----------------|-----------------|------------------|-----------------|
| Emissions | 5.44 | 8.86 | 13.74           | 1.22             | 0.11            | 0.10            | 0.38             | 15997.30        |

Table 5-19 Emissions for the transportation of cassava for 1 ton fuel ethanol production

| Diesel    | VOC   | CO    | NO <sub>x</sub> | PM <sub>10</sub> | SO <sub>x</sub> | CH <sub>4</sub> | N <sub>2</sub> O | CO <sub>2</sub> |
|-----------|-------|-------|-----------------|------------------|-----------------|-----------------|------------------|-----------------|
| Emissions | 15.77 | 25.68 | 39.83           | 3.54             | 0.32            | 0.29            | 1.09             | 46392.17        |

Table 5-20 Emissions for the transportation of ethanol by truck

| Diesel    | VOC  | CO   | NO <sub>x</sub> | PM <sub>10</sub> | SO <sub>x</sub> | CH <sub>4</sub> | N <sub>2</sub> O | CO <sub>2</sub> |
|-----------|------|------|-----------------|------------------|-----------------|-----------------|------------------|-----------------|
| Emissions | 5.44 | 8.86 | 13.74           | 1.22             | 0.11            | 0.10            | 0.38             | 15997.30        |

Table 5-21 Emissions for the transportation of fuel ethanol by diesel locomotive

| Diesel    | VOC  | CO   | NO <sub>x</sub> | PM <sub>10</sub> | SO <sub>x</sub> | CH <sub>4</sub> | N <sub>2</sub> O | CO <sub>2</sub> |
|-----------|------|------|-----------------|------------------|-----------------|-----------------|------------------|-----------------|
| Emissions | 1.00 | 1.63 | 2.53            | 0.22             | 0.02            | 0.02            | 0.07             | 2941.90         |

Table 5-22 Emissions for the transportation of fuel ethanol electric locomotive

| Electricity | VOC  | CO   | NO <sub>x</sub> | PM <sub>10</sub> | SO <sub>x</sub> | CH <sub>4</sub> | N <sub>2</sub> O | CO <sub>2</sub> |
|-------------|------|------|-----------------|------------------|-----------------|-----------------|------------------|-----------------|
| Emissions   | 0.01 | 0.09 | 1.15            | 0.11             | 2.75            | 0.01            | 0.01             | 896.03          |

Table 5-23 Emissions for the Fuel ethanol production

| Input       | VOC   | CO      | NO <sub>x</sub> | PM <sub>10</sub> | SO <sub>x</sub> | CH <sub>4</sub> | N <sub>2</sub> O | CO <sub>2</sub> |
|-------------|-------|---------|-----------------|------------------|-----------------|-----------------|------------------|-----------------|
| Electricity | 0.01  | 0.09    | 1.22            | 0.12             | 2.90            | 0.01            | 0.01             | 945.56          |
| Coal        | 14.48 | 1449.45 | 3188.50         | 190.95           | 9053.13         | 16.89           | 11.46            | 1463782.21      |

---

Table 5-24 Emissions for the distribution of fuel ethanol

| Electricity | VOC  | CO   | NO <sub>x</sub> | PM <sub>10</sub> | SO <sub>x</sub> | CH <sub>4</sub> | N <sub>2</sub> O | CO <sub>2</sub> |
|-------------|------|------|-----------------|------------------|-----------------|-----------------|------------------|-----------------|
| Emissions   | 0.00 | 0.04 | 0.47            | 0.05             | 1.12            | 0.00            | 0.00             | 366.73          |
